# Supplementary material for: Neuroprotective Efficacy of a Nanomicellar Complex of Carnosine and Lipoic Acid in a Rat Model of Rotenone-Induced Parkinson’s Disease
Source: MDPI journal article supplement (doi:10.3390/antiox12061215), 2023-06-04
Supplement: s1 [file s1]

**Table S1.** Food consumed per hour

|                    | Intact | Rotenone | CLA 25 | CLA 50 | Carn 50 |
|--------------------|--------|----------|--------|--------|---------|
| Mean               | 4,25   | 2,667    | 3,286  | 3,2    | 2,429   |
| Std. Error of Mean | 0,559  | 0,441    | 0,3595 | 0,8    | 0,4809  |

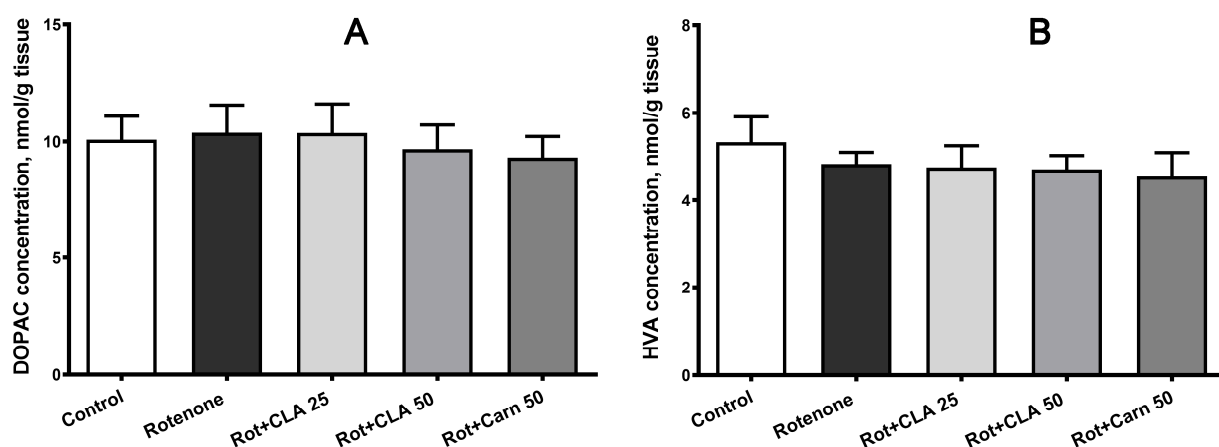

**Figure S1.** Effect of subcutaneous administration of rotenone, accompanied by the administration of carnosine (50 mg/kg) or carnosine-lipoic acid (CLA) complex (CLA) (25 and 50 mg/kg) for 18 days on the content of DA metabolites: A - 3,4-dihydroxyphenylacetic acid (DOPAC), B – homovanillic acid (HVA) in the striatum of experimental animals. \* – differences from intact animals with  $p < 0.05$ , \*\* -  $p = 0.01$ ; # - differences from animals that received rotenone with  $p < 0.05$ .

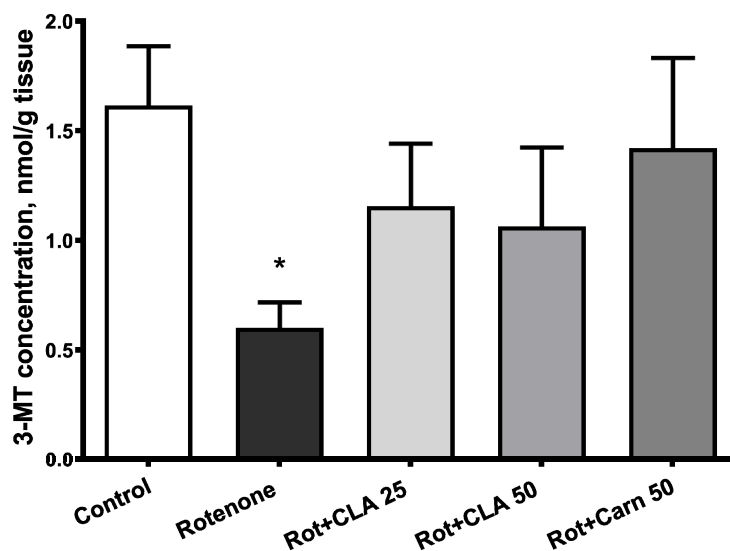

**Figure S2.** Effect of subcutaneous administration of rotenone, accompanied by the administration of carnosine (50 mg/kg) or carnosine-lipoic acid (CLA) complex (CLA) (25 and 50 mg/kg) for 18 days on the content of DA metabolite 3-methoxytyramine (3-MT). \* – differences from intact animals with  $p < 0.01$ .

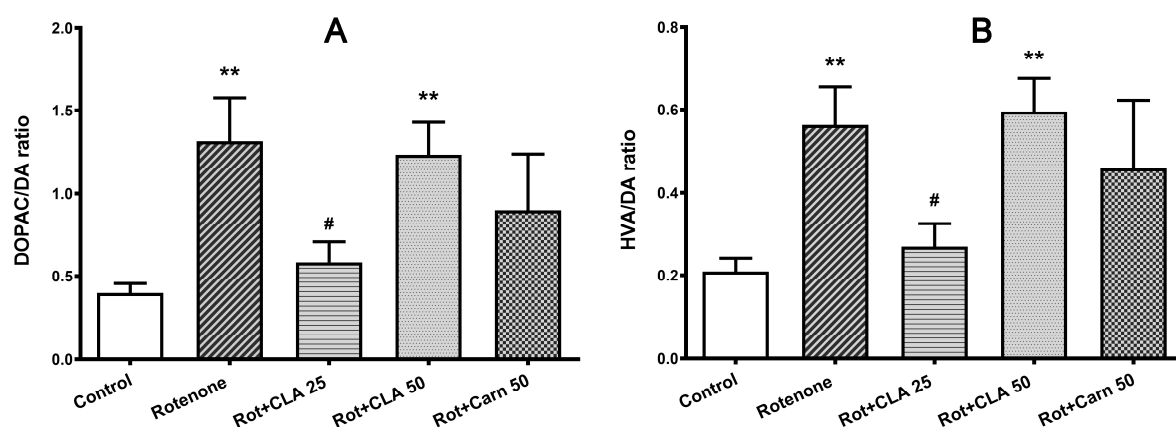

**Figure S3.** Effect of subcutaneous administration of rotenone, accompanied by the administration of carnosine (50 mg/kg) or carnosine-lipoic acid (CLA) complex (CLA) (25 and 50 mg/kg) for 18 days on the ratios metabolite/dopamine: A - DOPAC/DA, B – HVA/DA in the striatum of experimental animals. \* – differences from intact animals with  $p < 0.05$ , \*\* -  $p = 0.01$ ; # - differences from animals that received rotenone with  $p < 0.05$ .

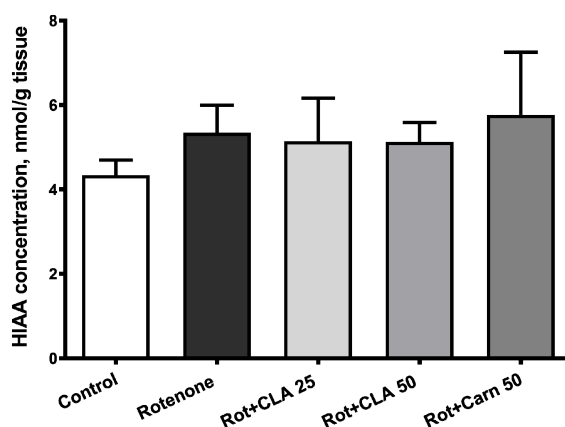

**Figure S4.** Effect of subcutaneous administration of rotenone, accompanied by the administration of carnosine (50 mg/kg) or carnosine-lipoic acid (CLA) complex (CLA) (25 and 50 mg/kg) for 18 days on the content of 5-HT metabolite 5-hydroxy indoleacetic acid (HIAA).
